# Supplementary figures and images for: Blending Traditional Vocational Services and Individualized Placement and Support for Formerly Incarcerated Veterans
Source: Atypon-hosted journal article supplement (doi:10.1176/appi.ps.201900421), 2020-05-12

**CONSORT diagram**

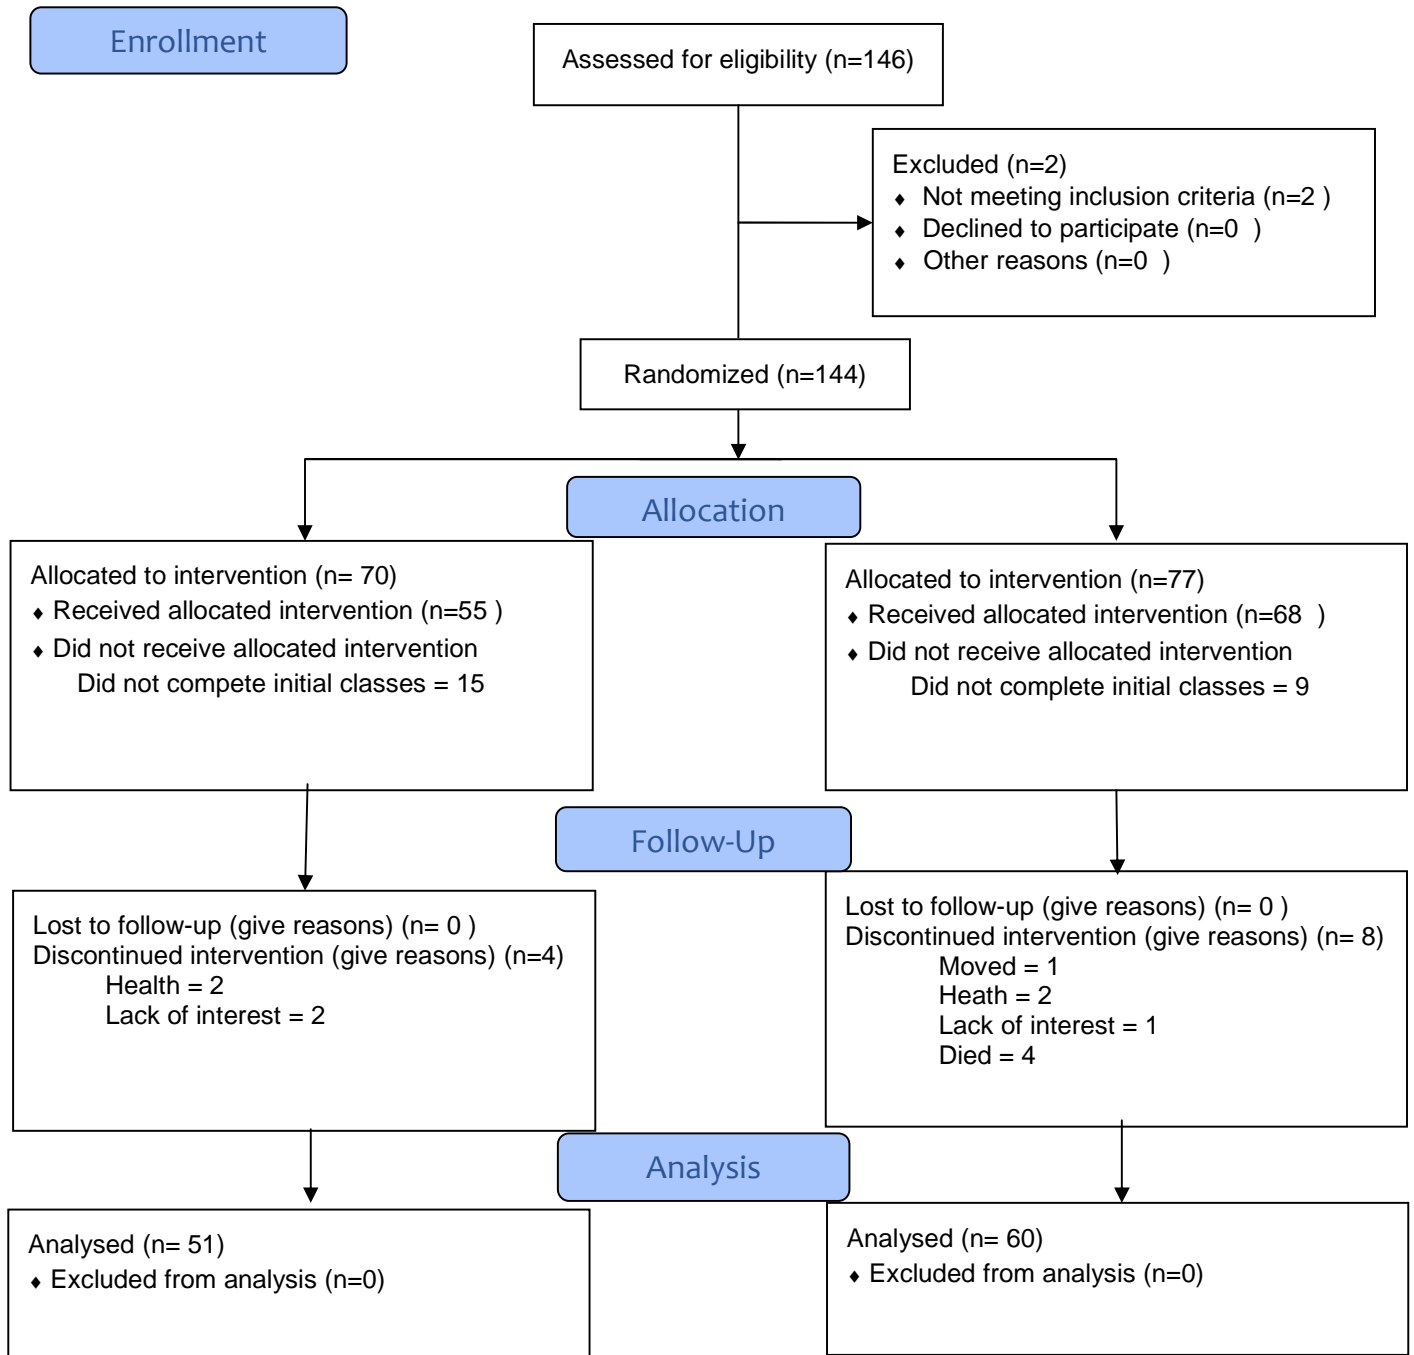

Supplement: appi.ps.201900421.ds001.pdf [file appi.ps.201900421.ds001.pdf]
